# Supplementary material for: High-resolution Satellite-derived Changes in Vegetation Phenology and Lake Area in a Central European Peatland
Source: Research Square preprint supplement (doi:10.21203/rs.3.rs-7148738/v1), 2025-08-04
Supplement: Supplementary file 1 [file be5697f2b2be374afe304484.docx]

**Supplementary Table 1**. Annual values of the site’s main hydrometeorological variables. Values of water table depth (WTD) are expressed as negative when indicating a belowground position; WTDavg is the annual average, WTDmin is the annual minimum depth and WTDmax is the annual maximum depth, in all cases in cm as a unit. Air temperature (Tair) value is shown in ºC and as an annual average. RH represents the relative humidity, and the values are shown as percentages. Lastly, precipitation values are shown in cumulative mm per year. The dominant vegetation per patch is P1 – *Sphagnum spp.*, *Carex spp*. and *Vaccinum oxycoccos* L.; P2 –*Phragmites australis* (Cav.) Trin. ex Steud; P3 ­– *Salix spp.*; P4 – *Carex spp.* transitioning to *Carex spp.*, *Menyanthes trifoliata* L., *Equisetum fluviale* L. and *Comarun palustre* L. co-dominance.

|  | **WTDavg** | **WTDmin** | **WTDmax** | **Tair** | **RH** | **Precipitation** |
| --- | --- | --- | --- | --- | --- | --- |
| **2017** |  |  |  | 9.029 | 85.25 |  |
| **2018** | -10.816 | 2.445 | -24.292 | 9.755 | 83.10 | 464.40 |
| **2019** | -13.107 | -3.550 | -25.536 | 10.081 | 85.65 | 549.00 |
| **2020** | -13.950 | -2.150 | -27.420 | 9.993 | 56.72 | 530.10 |
| **2021** | -16.226 | -6.777 | -28.477 | 8.489 | 40.82 | 525.20 |
| **2022** | -21.447 | -7.360 | -37.369 | 9.387 | 70.22 | 444.45 |
| **2023** | -17.107 | -6.799 | -30.927 | 9.795 | 83.43 | 774.35 |

**Supplementary Table 2**. Phenological parameters for the vegetation patches analysed (P1 – P4). The values shown are the length of the vegetation season as days and, between brackets, the start and end of the season. The dominant vegetation present in each patch is described in the Methodology section. The dominant vegetation per patch is P1 – *Sphagnum spp.*, *Carex spp*. and *Vaccinum oxycoccos* L.; P2 –*Phragmites australis* (Cav.) Trin. ex Steud; P3 ­– *Salix spp.*; P4 – *Carex spp.* transitioning to *Carex spp.*, *Menyanthes trifoliata* L., *Equisetum fluviale* L. and *Comarun palustre* L. co-dominance.

|  | **P1** | **P2** | **P3** | **P4** |
| --- | --- | --- | --- | --- |
| **2017** | 209 (May 5th - Dec 1st) | 182 (May 7th - Nov 5th) | 188 (Apr 25th - Oct 30th) | 183 (Apr 24th - Oct 24th) |
| **2018** | 222 (Apr 15th - Nov 22nd) | 161 (May 12th - Oct 20th) | 193 (Apr 22th - Nov 2th) | 161 (May 1st - Oct 9th) |
| **2019** | 220 (Apr 21st - Nov 27th) | 132 (Jun 14th - Oct 23th) | 187 (Apr 29th - Nov 2th) | 168 (May 6th - Oct 22th) |
| **2020** | 221 (Apr 1st - Nov 8th) | 160 (Jun 2th - Nov 9th) | 199 (Apr 26th - Nov 10th) | 176 (May 7th - Oct 30th) |
| **2021** | 186 (May 2th - Nov 5th) | 136 (Jun 3th - Oct 17th) | 167 (May 8th - Oct 22th) | 153 (May 13th - Oct 13th) |
| **2022** | 205 (Apr 29th - Nov 20th) | 146 (May 26th - Oct 20th) | 183 (Apr 30th - Oct 31th) | 164 (May 11th - Oct 22th) |
| **2023** | 210 (Apr 20th - Nov 17th) | 159 (Jun 2th - Nov 8th) | 194 (Apr 29th - Nov 10th) | 184 (May 5th - Oct 6th) |

**Supplementary Table 3**. Peak of the vegetation season day and value for the vegetation patches analysed (P1 – P4). The values shown are the maximum value of the Enhanced Vegetation Index or peak of the season and, between brackets, the day it occurs. The dominant vegetation present in each patch is described in the Methodology section. The dominant vegetation per patch is P1 – *Sphagnum spp.*, *Carex spp*. and *Vaccinum oxycoccos* L.; P2 –*Phragmites australis* (Cav.) Trin. ex Steud; P3 ­– *Salix spp.*; P4 – *Carex spp.* transitioning to *Carex spp.*, *Menyanthes trifoliata* L., *Equisetum fluviale* L. and *Comarun palustre* L. co-dominance.

|  | **P1** | **P2** | **P3** | **P4** |
| --- | --- | --- | --- | --- |
| **2017** | 0.500 (Jul 7th) | 0.485 (Aug 9th) | 0.484 (Jul 5th) | 0.451 (Jul 3rd) |
| **2018** | 0.477 (Jul 6th) | 0.519 (Jul 21st) | 0.467 (Jun 29th) | 0.421 (Jul 1st) |
| **2019** | 0.508 (Jul 28th) | 0.552 (Aug 21st) | 0.480 (Jul 22nd) | 0.439 (Jul 20th) |
| **2020** | 0.517 (Aug 3rd) | 0.507 (Aug 26th) | 0.438 (Jul 7th) | 0.521 (Aug 2nd) |
| **2021** | 0.612 (Jul 24th) | 0.615 (Aug 7th) | 0.524 (Jul 8th) | 0.600 (Jul 19th) |
| **2022** | 0.558 (Jul 27th) | 0.564 (Aug 6th) | 0.548 (Jun 21st) | 0.578 (Jul 19th) |
| **2023** | 0.521 (Jul 30th) | 0.510 (Sep 4th) | 0.542 (Jun 29th) | 0.520 (Jul 15th) |

**Supplementary Table 4**. Cross-correlation (r) results between the Enhanced Vegetation Index (EVI) and air temperature (Tair, ºC) or water table depth (WTD, cm) in daily averages for the vegetation patches analyzed (P1 – P4) and the entire peatland area (G). Note the first column indicates the displacement in days of the Tair or WTD in regards of EVI and the green cells mark the highest r per column. The dominant vegetation present in each patch is described in the Methodology section. The dominant vegetation per patch is P1 – *Sphagnum spp.*, *Carex spp*. and *Vaccinum oxycoccos* L.; P2 –*Phragmites australis* (Cav.) Trin. ex Steud; P3 ­– *Salix spp.*; P4 – *Carex spp.* transitioning to *Carex spp.*, *Menyanthes trifoliata* L., *Equisetum fluviale* L. and *Comarun palustre* L. co-dominance.

| **Lag** | **Tair_G** | **Tair_P1** | **Tair_P2** | **Tair_P3** | **Tair_P4** | **WTD_G** | **WTD_P1** | **WTD_P2** | **WTD_P3** | **WTD_P4** |
| --- | --- | --- | --- | --- | --- | --- | --- | --- | --- | --- |
| -60 | 0.79 | 0.78 | 0.79 | 0.70 | 0.79 | -0.95 | -0.94 | -0.94 | -0.90 | -0.95 |
| -59 | 0.79 | 0.78 | 0.79 | 0.71 | 0.79 | -0.95 | -0.94 | -0.94 | -0.90 | -0.95 |
| -58 | 0.79 | 0.78 | 0.80 | 0.71 | 0.79 | -0.95 | -0.94 | -0.95 | -0.90 | -0.95 |
| -57 | 0.80 | 0.79 | 0.80 | 0.72 | 0.79 | -0.95 | -0.94 | -0.95 | -0.90 | -0.95 |
| -56 | 0.80 | 0.79 | 0.80 | 0.72 | 0.79 | -0.95 | -0.94 | -0.95 | -0.90 | -0.95 |
| -55 | 0.80 | 0.79 | 0.81 | 0.72 | 0.80 | -0.95 | -0.94 | -0.95 | -0.90 | -0.95 |
| -54 | 0.80 | 0.80 | 0.81 | 0.73 | 0.80 | -0.95 | -0.94 | -0.95 | -0.90 | -0.95 |
| -53 | 0.81 | 0.80 | 0.81 | 0.73 | 0.80 | -0.95 | -0.94 | -0.95 | -0.90 | -0.95 |
| -52 | 0.81 | 0.80 | 0.81 | 0.74 | 0.80 | -0.95 | -0.94 | -0.95 | -0.90 | -0.95 |
| -51 | 0.81 | 0.81 | 0.82 | 0.74 | 0.80 | -0.95 | -0.94 | -0.95 | -0.90 | -0.95 |
| -50 | 0.82 | 0.81 | 0.82 | 0.74 | 0.81 | -0.95 | -0.94 | -0.95 | -0.91 | -0.95 |
| -49 | 0.82 | 0.81 | 0.82 | 0.75 | 0.81 | -0.95 | -0.94 | -0.95 | -0.91 | -0.95 |
| -48 | 0.82 | 0.82 | 0.83 | 0.75 | 0.81 | -0.95 | -0.94 | -0.95 | -0.91 | -0.95 |
| -47 | 0.82 | 0.82 | 0.83 | 0.75 | 0.81 | -0.95 | -0.94 | -0.95 | -0.91 | -0.95 |
| -46 | 0.83 | 0.82 | 0.83 | 0.76 | 0.81 | -0.95 | -0.94 | -0.95 | -0.91 | -0.95 |
| -45 | 0.83 | 0.83 | 0.84 | 0.76 | 0.82 | -0.95 | -0.94 | -0.95 | -0.91 | -0.95 |
| -44 | 0.83 | 0.83 | 0.84 | 0.77 | 0.82 | -0.95 | -0.95 | -0.95 | -0.91 | -0.95 |
| -43 | 0.83 | 0.83 | 0.84 | 0.77 | 0.82 | -0.95 | -0.95 | -0.95 | -0.91 | -0.95 |
| -42 | 0.84 | 0.83 | 0.85 | 0.77 | 0.82 | -0.95 | -0.95 | -0.95 | -0.91 | -0.95 |
| -41 | 0.84 | 0.84 | 0.85 | 0.78 | 0.82 | -0.96 | -0.95 | -0.95 | -0.91 | -0.95 |
| -40 | 0.84 | 0.84 | 0.85 | 0.78 | 0.83 | -0.96 | -0.95 | -0.95 | -0.91 | -0.95 |
| -39 | 0.84 | 0.84 | 0.85 | 0.78 | 0.83 | -0.96 | -0.95 | -0.95 | -0.91 | -0.95 |
| -38 | 0.84 | 0.84 | 0.86 | 0.79 | 0.83 | -0.96 | -0.95 | -0.95 | -0.91 | -0.95 |
| -37 | 0.85 | 0.85 | 0.86 | 0.79 | 0.83 | -0.96 | -0.95 | -0.95 | -0.91 | -0.95 |
| -36 | 0.85 | 0.85 | 0.86 | 0.80 | 0.83 | -0.96 | -0.95 | -0.95 | -0.92 | -0.95 |
| -35 | 0.85 | 0.85 | 0.87 | 0.80 | 0.84 | -0.96 | -0.95 | -0.95 | -0.92 | -0.96 |
| -34 | 0.85 | 0.86 | 0.87 | 0.80 | 0.84 | -0.96 | -0.95 | -0.95 | -0.92 | -0.96 |
| -33 | 0.86 | 0.86 | 0.87 | 0.81 | 0.84 | -0.96 | -0.95 | -0.95 | -0.92 | -0.96 |
| -32 | 0.86 | 0.86 | 0.87 | 0.81 | 0.84 | -0.96 | -0.95 | -0.95 | -0.92 | -0.96 |
| -31 | 0.86 | 0.86 | 0.88 | 0.81 | 0.84 | -0.96 | -0.95 | -0.95 | -0.92 | -0.96 |
| -30 | 0.86 | 0.87 | 0.88 | 0.82 | 0.84 | -0.96 | -0.95 | -0.95 | -0.92 | -0.96 |
| -29 | 0.86 | 0.87 | 0.88 | 0.82 | 0.85 | -0.95 | -0.95 | -0.95 | -0.92 | -0.96 |
| -28 | 0.87 | 0.87 | 0.88 | 0.82 | 0.85 | -0.95 | -0.95 | -0.95 | -0.92 | -0.96 |
| -27 | 0.87 | 0.87 | 0.89 | 0.83 | 0.85 | -0.95 | -0.95 | -0.95 | -0.92 | -0.96 |
| -26 | 0.87 | 0.87 | 0.89 | 0.83 | 0.85 | -0.95 | -0.95 | -0.95 | -0.92 | -0.96 |
| -25 | 0.87 | 0.88 | 0.89 | 0.83 | 0.85 | -0.95 | -0.95 | -0.95 | -0.92 | -0.96 |
| -24 | 0.87 | 0.88 | 0.89 | 0.84 | 0.85 | -0.95 | -0.95 | -0.95 | -0.92 | -0.96 |
| -23 | 0.88 | 0.88 | 0.89 | 0.84 | 0.86 | -0.95 | -0.95 | -0.95 | -0.92 | -0.95 |
| -22 | 0.88 | 0.88 | 0.90 | 0.84 | 0.86 | -0.95 | -0.94 | -0.95 | -0.92 | -0.95 |
| -21 | 0.88 | 0.89 | 0.90 | 0.85 | 0.86 | -0.95 | -0.94 | -0.95 | -0.92 | -0.95 |
| -20 | 0.88 | 0.89 | 0.90 | 0.85 | 0.86 | -0.95 | -0.94 | -0.95 | -0.92 | -0.95 |
| -19 | 0.88 | 0.89 | 0.90 | 0.85 | 0.86 | -0.95 | -0.94 | -0.94 | -0.92 | -0.95 |
| -18 | 0.88 | 0.89 | 0.90 | 0.85 | 0.86 | -0.95 | -0.94 | -0.94 | -0.92 | -0.95 |
| -17 | 0.89 | 0.89 | 0.91 | 0.86 | 0.86 | -0.95 | -0.94 | -0.94 | -0.92 | -0.95 |
| -16 | 0.89 | 0.89 | 0.91 | 0.86 | 0.87 | -0.95 | -0.94 | -0.94 | -0.92 | -0.95 |
| -15 | 0.89 | 0.90 | 0.91 | 0.86 | 0.87 | -0.95 | -0.94 | -0.94 | -0.92 | -0.95 |
| -14 | 0.89 | 0.90 | 0.91 | 0.87 | 0.87 | -0.95 | -0.94 | -0.94 | -0.92 | -0.95 |
| -13 | 0.89 | 0.90 | 0.91 | 0.87 | 0.87 | -0.95 | -0.94 | -0.94 | -0.92 | -0.95 |
| -12 | 0.89 | 0.90 | 0.91 | 0.87 | 0.87 | -0.95 | -0.94 | -0.94 | -0.92 | -0.95 |
| -11 | 0.89 | 0.90 | 0.92 | 0.87 | 0.87 | -0.95 | -0.94 | -0.94 | -0.92 | -0.95 |
| -10 | 0.90 | 0.90 | 0.92 | 0.88 | 0.87 | -0.95 | -0.94 | -0.94 | -0.92 | -0.95 |
| -9 | 0.90 | 0.91 | 0.92 | 0.88 | 0.87 | -0.95 | -0.94 | -0.94 | -0.92 | -0.95 |
| -8 | 0.90 | 0.91 | 0.92 | 0.88 | 0.87 | -0.95 | -0.94 | -0.94 | -0.92 | -0.95 |
| -7 | 0.90 | 0.91 | 0.92 | 0.88 | 0.88 | -0.95 | -0.94 | -0.94 | -0.92 | -0.95 |
| -6 | 0.90 | 0.91 | 0.92 | 0.89 | 0.88 | -0.94 | -0.93 | -0.93 | -0.92 | -0.95 |
| -5 | 0.90 | 0.91 | 0.92 | 0.89 | 0.88 | -0.94 | -0.93 | -0.93 | -0.92 | -0.95 |
| -4 | 0.90 | 0.91 | 0.92 | 0.89 | 0.88 | -0.94 | -0.93 | -0.93 | -0.91 | -0.95 |
| -3 | 0.90 | 0.91 | 0.92 | 0.89 | 0.88 | -0.94 | -0.93 | -0.93 | -0.91 | -0.95 |
| -2 | 0.90 | 0.91 | 0.92 | 0.89 | 0.88 | -0.94 | -0.93 | -0.93 | -0.91 | -0.95 |
| -1 | 0.90 | 0.91 | 0.93 | 0.90 | 0.88 | -0.94 | -0.93 | -0.93 | -0.91 | -0.95 |
| 0 | 0.91 | 0.91 | 0.93 | 0.90 | 0.88 | -0.94 | -0.93 | -0.93 | -0.91 | -0.95 |

**Supplementary Table 5**. Cross-correlation (r) results between the Enhanced Vegetation Index (EVI) and air temperature (Tair, ºC), water table depth (WTD, cm) or precipitation (PP, mm) in weekly averages, except PP sum, for the vegetation patches analyzed (P1 – P4) and the entire peatland area (G). Note the first column indicates the displacement in days of the Tair or WTD in regards of EVI and the green cells mark the highest r per column. The dominant vegetation present in each patch is described in the Methodology section. The dominant vegetation per patch is P1 – *Sphagnum spp.*, *Carex spp*. and *Vaccinum oxycoccos* L.; P2 –*Phragmites australis* (Cav.) Trin. ex Steud; P3 ­– *Salix spp.*; P4 – *Carex spp.* transitioning to *Carex spp.*, *Menyanthes trifoliata* L., *Equisetum fluviale* L. and *Comarun palustre* L. co-dominance.

| **Lag** | **Tair_G** | **Tair_P1** | **Tair_P2** | **Tair_P3** | **Tai_P4** | **WTD_G** | **WTD_P1** | **WTD_P2** | **WTD_P3** | **WTD_P4** | **PP_G** | **PP_P1** | **PP_P2** | **PP_P3** | **PP_P4** |
| --- | --- | --- | --- | --- | --- | --- | --- | --- | --- | --- | --- | --- | --- | --- | --- |
| -20 | 0.59 | 0.54 | 0.54 | 0.48 | 0.63 | -0.85 | -0.82 | -0.82 | -0.76 | -0.86 | 0.60 | 0.58 | 0.59 | 0.56 | 0.62 |
| -19 | 0.61 | 0.56 | 0.56 | 0.49 | 0.64 | -0.86 | -0.83 | -0.83 | -0.78 | -0.87 | 0.61 | 0.58 | 0.59 | 0.56 | 0.62 |
| -18 | 0.62 | 0.57 | 0.57 | 0.50 | 0.65 | -0.87 | -0.85 | -0.85 | -0.79 | -0.88 | 0.61 | 0.58 | 0.59 | 0.56 | 0.62 |
| -17 | 0.64 | 0.59 | 0.59 | 0.52 | 0.67 | -0.88 | -0.86 | -0.86 | -0.80 | -0.89 | 0.61 | 0.58 | 0.59 | 0.56 | 0.62 |
| -16 | 0.66 | 0.61 | 0.62 | 0.54 | 0.68 | -0.89 | -0.87 | -0.88 | -0.82 | -0.90 | 0.62 | 0.59 | 0.59 | 0.56 | 0.63 |
| -15 | 0.68 | 0.64 | 0.64 | 0.56 | 0.70 | -0.90 | -0.88 | -0.89 | -0.83 | -0.91 | 0.62 | 0.59 | 0.60 | 0.56 | 0.63 |
| -14 | 0.70 | 0.66 | 0.67 | 0.58 | 0.71 | -0.91 | -0.89 | -0.90 | -0.84 | -0.91 | 0.63 | 0.60 | 0.60 | 0.56 | 0.64 |
| -13 | 0.72 | 0.69 | 0.69 | 0.60 | 0.73 | -0.92 | -0.90 | -0.91 | -0.86 | -0.92 | 0.63 | 0.60 | 0.61 | 0.57 | 0.64 |
| -12 | 0.74 | 0.71 | 0.72 | 0.63 | 0.75 | -0.93 | -0.91 | -0.92 | -0.87 | -0.93 | 0.63 | 0.61 | 0.61 | 0.57 | 0.64 |
| -11 | 0.76 | 0.73 | 0.74 | 0.65 | 0.76 | -0.94 | -0.92 | -0.93 | -0.88 | -0.93 | 0.64 | 0.61 | 0.62 | 0.57 | 0.65 |
| -10 | 0.78 | 0.76 | 0.77 | 0.68 | 0.78 | -0.94 | -0.93 | -0.94 | -0.89 | -0.94 | 0.64 | 0.62 | 0.63 | 0.58 | 0.65 |
| -9 | 0.80 | 0.78 | 0.80 | 0.71 | 0.80 | -0.95 | -0.94 | -0.94 | -0.89 | -0.95 | 0.65 | 0.63 | 0.63 | 0.59 | 0.66 |
| -8 | 0.82 | 0.81 | 0.82 | 0.73 | 0.81 | -0.95 | -0.94 | -0.95 | -0.90 | -0.95 | 0.65 | 0.63 | 0.64 | 0.59 | 0.66 |
| -7 | 0.83 | 0.83 | 0.84 | 0.76 | 0.83 | -0.95 | -0.94 | -0.95 | -0.91 | -0.95 | 0.65 | 0.64 | 0.64 | 0.60 | 0.66 |
| -6 | 0.85 | 0.85 | 0.86 | 0.79 | 0.84 | -0.96 | -0.95 | -0.95 | -0.91 | -0.95 | 0.66 | 0.64 | 0.65 | 0.60 | 0.67 |
| -5 | 0.87 | 0.87 | 0.88 | 0.82 | 0.85 | -0.96 | -0.95 | -0.95 | -0.92 | -0.96 | 0.66 | 0.65 | 0.65 | 0.61 | 0.67 |
| -4 | 0.88 | 0.89 | 0.90 | 0.84 | 0.87 | -0.96 | -0.95 | -0.95 | -0.92 | -0.96 | 0.67 | 0.65 | 0.66 | 0.62 | 0.67 |
| -3 | 0.90 | 0.90 | 0.92 | 0.86 | 0.88 | -0.95 | -0.95 | -0.95 | -0.92 | -0.96 | 0.67 | 0.66 | 0.66 | 0.62 | 0.68 |
| -2 | 0.91 | 0.92 | 0.93 | 0.88 | 0.89 | -0.95 | -0.94 | -0.94 | -0.92 | -0.95 | 0.67 | 0.66 | 0.66 | 0.63 | 0.68 |
| -1 | 0.92 | 0.93 | 0.94 | 0.90 | 0.89 | -0.95 | -0.94 | -0.94 | -0.92 | -0.95 | 0.67 | 0.66 | 0.66 | 0.63 | 0.68 |
| 0 | 0.92 | 0.93 | 0.95 | 0.92 | 0.90 | -0.94 | -0.93 | -0.93 | -0.91 | -0.95 | 0.68 | 0.66 | 0.66 | 0.63 | 0.68 |

**Supplementary Table 6**. Cross-correlation (r) results between the Enhanced Vegetation Index (EVI) and air temperature (Tair, ºC), water table depth (WTD, cm) or precipitation (PP, mm) in monthly averages, except PP sum, for the vegetation patches analyzed (P1 – P4) and the entire peatland area (G). Note the first column indicates the displacement in days of the Tair or WTD in regards of EVI and the green cells mark the highest r per column. The dominant vegetation present in each patch is described in the Methodology section. The dominant vegetation per patch is P1 – *Sphagnum spp.*, *Carex spp*. and *Vaccinum oxycoccos* L.; P2 –*Phragmites australis* (Cav.) Trin. ex Steud; P3 ­– *Salix spp.*; P4 – *Carex spp.* transitioning to *Carex spp.*, *Menyanthes trifoliata* L., *Equisetum fluviale* L. and *Comarun palustre* L. co-dominance.

| **Lag** | **Tair_G** | **Tair_P1** | **Tair_P2** | **Tair_P3** | **Tair_P4** | **WTD_G** | **WTD_P1** | **WTD_P2** | **WTD_P3** | **WTD_P4** | **PP_G** | **PP_P1** | **PP_P2** | **PP_P3** | **PP_P4** |
| --- | --- | --- | --- | --- | --- | --- | --- | --- | --- | --- | --- | --- | --- | --- | --- |
| -20 | 0.50 | 0.46 | 0.46 | 0.48 | 0.52 | -0.63 | -0.59 | -0.58 | -0.57 | -0.65 | 0.58 | 0.55 | 0.55 | 0.55 | 0.60 |
| -19 | 0.47 | 0.43 | 0.42 | 0.43 | 0.50 | -0.64 | -0.60 | -0.59 | -0.57 | -0.67 | 0.60 | 0.57 | 0.57 | 0.55 | 0.62 |
| -18 | 0.47 | 0.42 | 0.41 | 0.40 | 0.50 | -0.66 | -0.64 | -0.62 | -0.60 | -0.69 | 0.61 | 0.59 | 0.59 | 0.57 | 0.63 |
| -17 | 0.49 | 0.44 | 0.44 | 0.41 | 0.52 | -0.70 | -0.68 | -0.67 | -0.64 | -0.72 | 0.63 | 0.61 | 0.61 | 0.59 | 0.65 |
| -16 | 0.53 | 0.50 | 0.49 | 0.45 | 0.56 | -0.74 | -0.73 | -0.72 | -0.69 | -0.76 | 0.65 | 0.63 | 0.63 | 0.62 | 0.66 |
| -15 | 0.60 | 0.58 | 0.58 | 0.52 | 0.61 | -0.78 | -0.78 | -0.77 | -0.75 | -0.79 | 0.68 | 0.65 | 0.66 | 0.64 | 0.69 |
| -14 | 0.67 | 0.66 | 0.67 | 0.62 | 0.67 | -0.82 | -0.81 | -0.80 | -0.79 | -0.82 | 0.70 | 0.68 | 0.69 | 0.66 | 0.71 |
| -13 | 0.74 | 0.74 | 0.74 | 0.72 | 0.72 | -0.83 | -0.83 | -0.82 | -0.82 | -0.83 | 0.73 | 0.71 | 0.71 | 0.69 | 0.73 |
| -12 | 0.77 | 0.78 | 0.78 | 0.79 | 0.76 | -0.83 | -0.82 | -0.81 | -0.83 | -0.84 | 0.74 | 0.72 | 0.72 | 0.72 | 0.75 |
| -11 | 0.77 | 0.77 | 0.77 | 0.80 | 0.76 | -0.81 | -0.79 | -0.78 | -0.80 | -0.83 | 0.73 | 0.71 | 0.71 | 0.71 | 0.74 |
| -10 | 0.73 | 0.72 | 0.72 | 0.76 | 0.73 | -0.79 | -0.75 | -0.74 | -0.76 | -0.81 | 0.72 | 0.69 | 0.69 | 0.69 | 0.74 |
| -9 | 0.68 | 0.64 | 0.64 | 0.68 | 0.69 | -0.76 | -0.72 | -0.71 | -0.71 | -0.79 | 0.71 | 0.67 | 0.66 | 0.66 | 0.73 |
| -8 | 0.62 | 0.58 | 0.57 | 0.59 | 0.65 | -0.75 | -0.71 | -0.69 | -0.68 | -0.79 | 0.70 | 0.66 | 0.66 | 0.64 | 0.72 |
| -7 | 0.59 | 0.53 | 0.52 | 0.52 | 0.63 | -0.76 | -0.72 | -0.71 | -0.67 | -0.79 | 0.72 | 0.69 | 0.69 | 0.65 | 0.74 |
| -6 | 0.57 | 0.51 | 0.51 | 0.48 | 0.62 | -0.79 | -0.75 | -0.75 | -0.70 | -0.82 | 0.74 | 0.71 | 0.70 | 0.67 | 0.75 |
| -5 | 0.60 | 0.54 | 0.53 | 0.48 | 0.64 | -0.83 | -0.80 | -0.80 | -0.74 | -0.85 | 0.76 | 0.73 | 0.73 | 0.70 | 0.77 |
| -4 | 0.65 | 0.60 | 0.60 | 0.53 | 0.68 | -0.88 | -0.86 | -0.86 | -0.80 | -0.89 | 0.77 | 0.74 | 0.75 | 0.71 | 0.79 |
| -3 | 0.73 | 0.70 | 0.70 | 0.61 | 0.74 | -0.92 | -0.91 | -0.91 | -0.86 | -0.92 | 0.79 | 0.76 | 0.77 | 0.72 | 0.81 |
| -2 | 0.81 | 0.80 | 0.81 | 0.73 | 0.81 | -0.95 | -0.94 | -0.95 | -0.90 | -0.95 | 0.81 | 0.79 | 0.80 | 0.74 | 0.83 |
| -1 | 0.89 | 0.89 | 0.91 | 0.84 | 0.87 | -0.96 | -0.95 | -0.95 | -0.92 | -0.96 | 0.84 | 0.83 | 0.83 | 0.78 | 0.85 |
| 0 | 0.94 | 0.95 | 0.96 | 0.93 | 0.91 | -0.94 | -0.93 | -0.93 | -0.92 | -0.95 | 0.85 | 0.84 | 0.83 | 0.80 | 0.86 |

**Supplementary Table 7**. Partial Least Squares Regression (PLSR) variable importance (VIP) results between the Enhanced Vegetation Index (EVI) and air temperature (Tair, ºC), water table depth (WTD, cm) and precipitation (PP, mm) in weekly and monthly averages, except PP sum, for the vegetation patches analyzed (P1 – P4) and the entire peatland area (G). Note for a variable to be considered important VIP score should be higher than 1. The dominant vegetation present in each patch is described in the Methodology section. The dominant vegetation per patch is P1 – *Sphagnum spp.*, *Carex spp*. and *Vaccinum oxycoccos* L.; P2 –*Phragmites australis* (Cav.) Trin. ex Steud; P3 ­– *Salix spp.*; P4 – *Carex spp.* transitioning to *Carex spp.*, *Menyanthes trifoliata* L., *Equisetum fluviale* L. and *Comarun palustre* L. co-dominance.

| **Weekly** | **G** | **P1** | **P2** | **P3** | **P4** | **Monthly** | **G** | **P1** | **P2** | **P3** | **P4** |
| --- | --- | --- | --- | --- | --- | --- | --- | --- | --- | --- | --- |
| **Tair** | 1.36 | 1.35 | 1.37 | 1.36 | 1.32 | **Tair** | 1.35 | 1.34 | 1.36 | 1.36 | 1.31 |
| **WTD** | 1.07 | 1.08 | 1.06 | 1.06 | 1.12 | **WTD** | 1.08 | 1.08 | 1.07 | 1.07 | 1.13 |
| **PP** | 0.08 | 0.09 | 0.08 | 0.09 | 0.09 | **PP** | 0.12 | 0.14 | 0.11 | 0.10 | 0.14 |

**Supplementary Table 8**. Coefficient of determination (R2), p-value (p-val), Root Mean Square Error (RMSE) and validation with ground truth (0-1; Validation) of the linear regression between the lake’s water or dry area with water table depth.

|  | **R2** | **p-val** | **RMSE** | **Validation** |
| --- | --- | --- | --- | --- |
| **Water** | 0.50 | 1.31E-48 | 0.0138 | 0.9986 |
| **Dry** | 0.51 | 6.87E-49 | 0.0137 | 0.6066 |


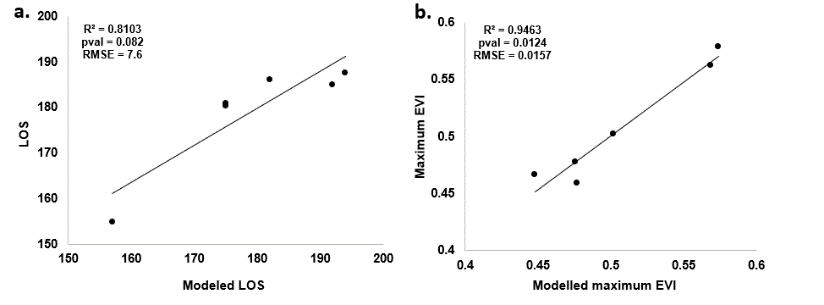


**Supplementary Figure 1**. Linear regression of the Length of the Season (LOS, a) and maximum Enhanced Vegetation Index (EVI) value (b) from 2018 to 2023 with the modelled parameter based on annual average water table depth and air temperature. Note that 2017 was excluded from analyses due to missing reliable WTD data.

**
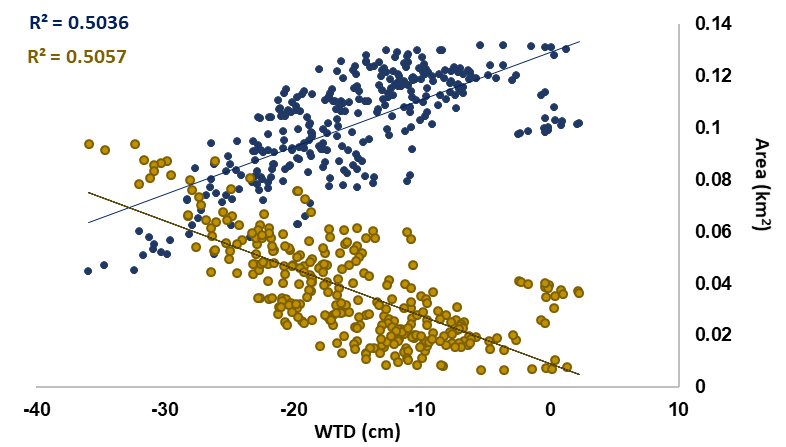
**

**Supplementary Figure 2.** The linear regression between Water Table Depth (WTD) and the area of the lake covered by water (dark blue) or with the exposed bottom (dark yellow) in weekly timesteps for the period between 2018 and 2023. Note that 2017 was excluded from analyses due to missing reliable WTD data.
